# Supplementary material for: The Response of Thiols to Cadmium Stress in Spinach (Spinacia Oleracea L.)
Source: MDPI journal article supplement (doi:10.3390/toxics10080429), 2022-07-28
Supplement: s1 [file s1]

# Supplementary Information

## The response of thiols to cadmium stress in spinach (*Spinacia oleracea* L.)

Ya Gao,<sup>1,2</sup> Haipu Li,<sup>1,2,\*</sup> Yang Song,<sup>1,2</sup> Fenglin Zhang,<sup>1,2</sup> and Zhaoguang Yang<sup>1,2</sup>

<sup>1</sup>Center for Environment and Water Resources, College of Chemistry and Chemical Engineering, Central South University, Changsha 410083, China

<sup>2</sup>Key Laboratory of Hunan Province for Water Environment and Agriculture Product Safety, Changsha, China

\*Corresponding authors. Tel: +86 731 88876961

\*Email addresses: lihaipu@csu.edu.cn (Haipu Li)

### Tables and figures captions:

**Figure S1** Total thiol in shoots with treatment of varying concentrations of Cd.

**Figure S2** The constitutes of thiol compounds in roots under varying Cd stresses.

**Figure S3** The constitutes of thiol compounds in shoots under varying Cd stresses.

**Figure S4** The constitutes of thiol compounds in leaves under varying Cd stresses.

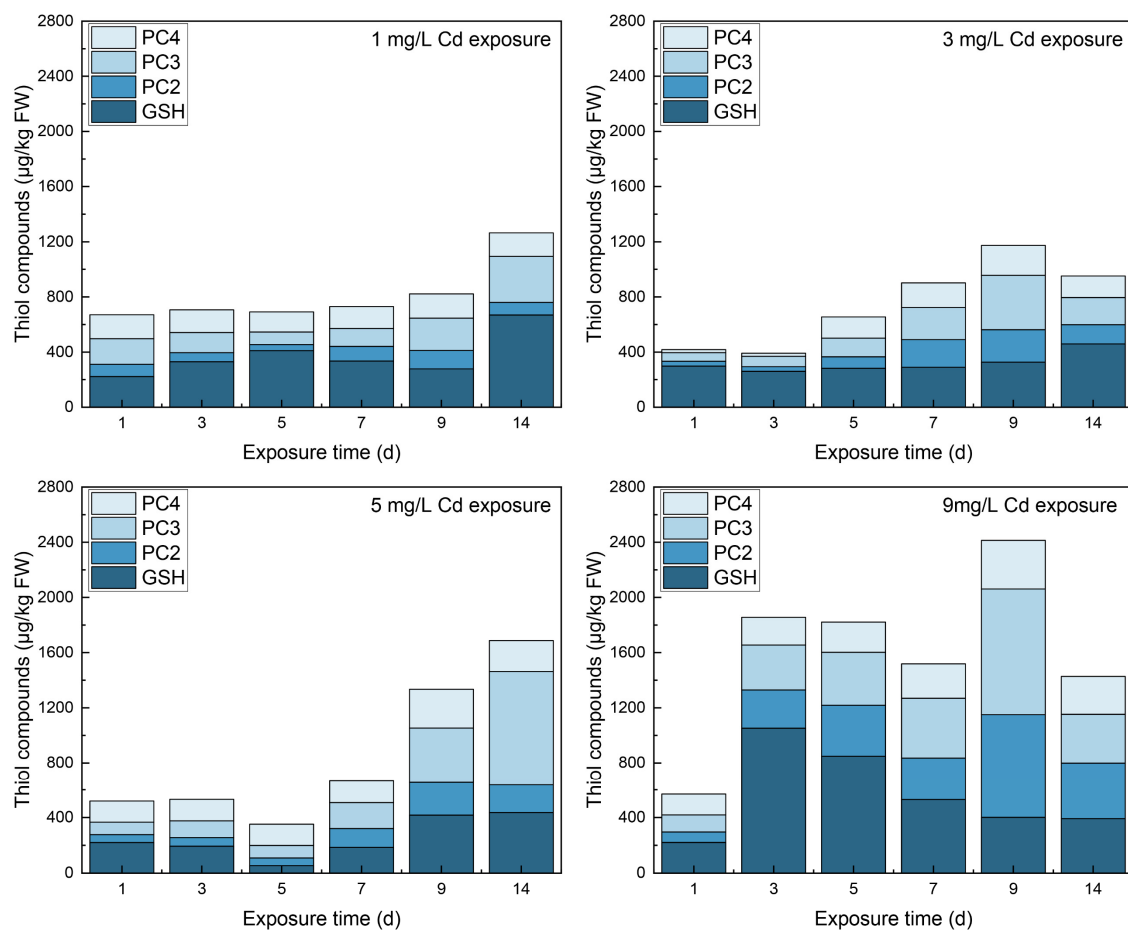

**Figure S1** Total thiols in shoots with treatment of varying concentrations of Cd.

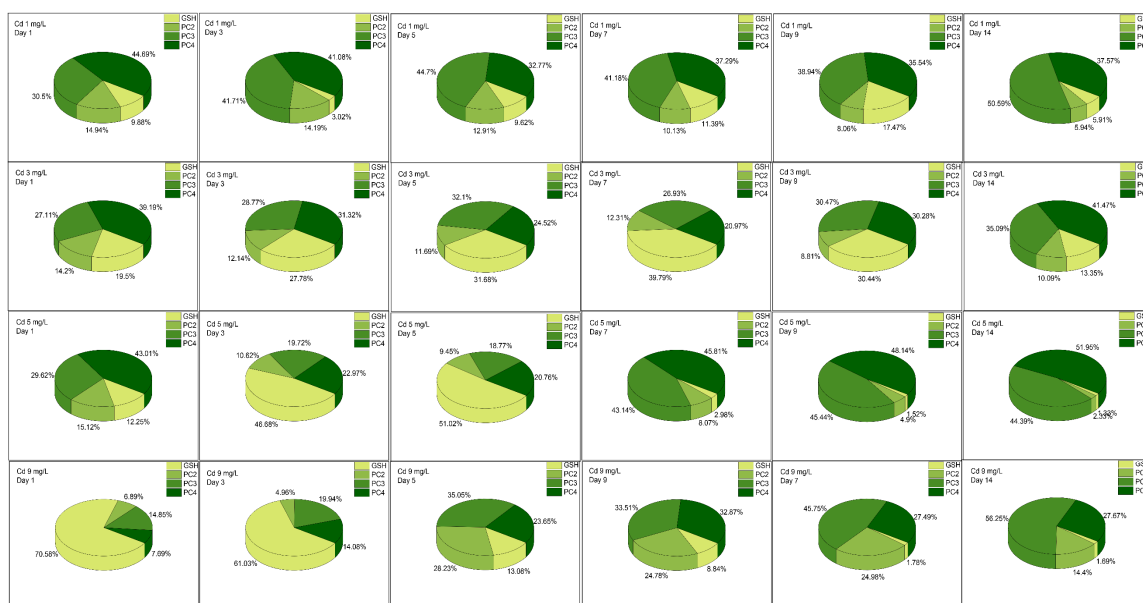

**Figure S2** The constitutes of thiol compounds in roots under varying Cd stress.

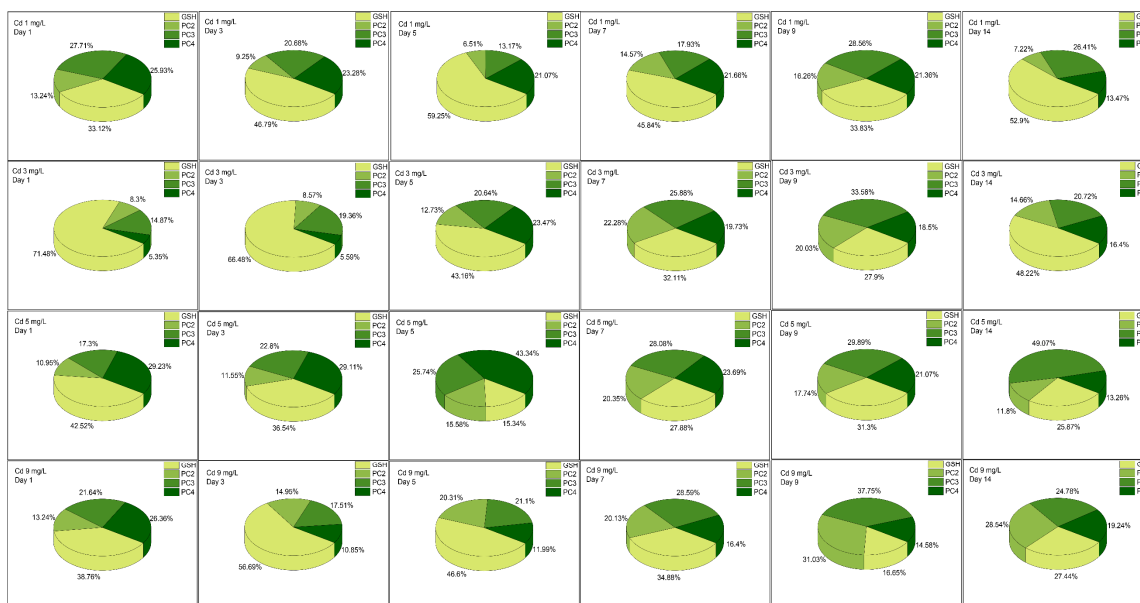

**Figure S3** The constitutes of thiol compounds in shoots under varying Cd stress.

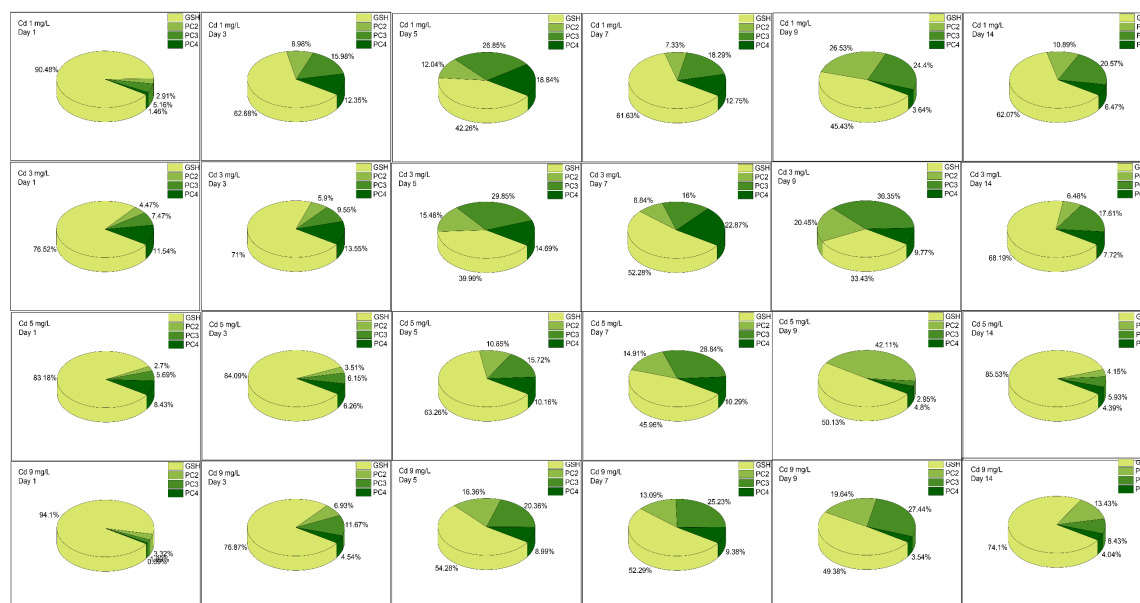

**Figure S4** The constitutes of thiol compounds in leaves under varying Cd stress.
